# Supplementary material for: Anticancer drug delivery to cancer cells using alkyl amine-functionalized nanodiamond supraparticles
Source: Royal Society of Chemistry journal article supplement (doi:10.1039/c9na00453j), 2019-01-01
Supplement: c9na00453j1.pdf [file c9na00453j1.pdf]

**Supporting Information for:**

# Anticancer drug delivery to cancer cells using alkyl amine-functionalized nanodiamond supraparticles

*Yue Yu,<sup>ab</sup> Xi Yang,<sup>ab</sup> Masahiro Nishikawa,<sup>c</sup> Ming Liu,<sup>c</sup> Takahiro Tei,<sup>d</sup> and Eijiro Miyako<sup>\*ab</sup>*

- a. Nanomaterials Research Institute (NMRI), National Institute of Advanced Industrial Science and Technology (AIST), Central 5, 1-1-1 Higashi, Tsukuba, Ibaraki 305-8565, Japan.
- b. Present address: School of Materials Science, Japan Advanced Institute of Science and Technology, 1-1 Asahidai, Nomi, Ishikawa, 923-1292, Japan.
- c. Corporate Research Center, R&D Headquarters, Daicel Corporation, 1239, Shinzaike, Aboshi-ku, Himeji, Hyogo 671-1283, Japan.
- d. Advanced Materials Planning, R&D Headquarters, Daicel Corporation, 2-19-1 Konan, Minato-ku, Tokyo 108-8230, Japan.

\* To whom correspondence should be addressed. E-mail: e-miyako@jaist.ac.jp

## Supporting Figures

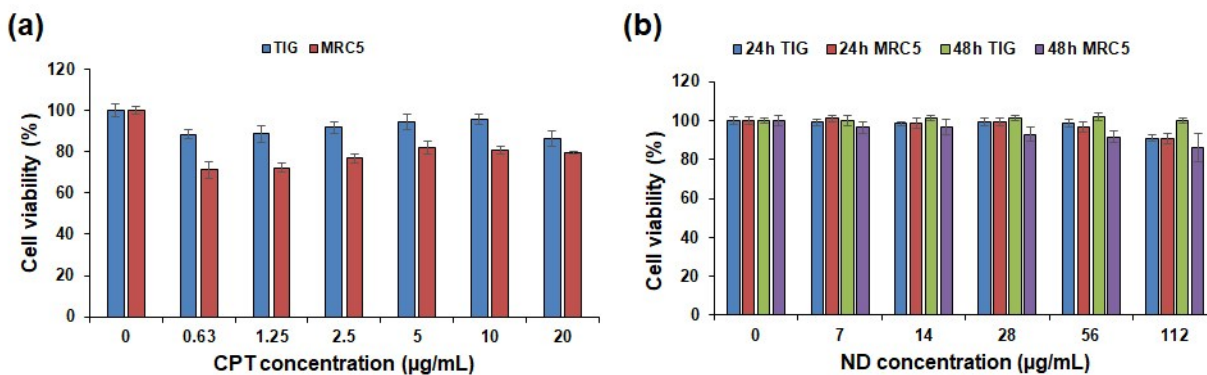

**Figure S1.** (a) Drug efficacy of CPT@Dod-ND-SPs on normal cell lines. The TIG-3 and MRC5 fibroblast cell viabilities were tested after 24 h of exposure with CPT@Dod-ND-SPs. Data represent the mean of five determinations; error bars show the SD. (b) Cytotoxicity test of Dod-ND-SPs on normal cell lines. The TIG-3 and MRC5 fibroblast cell viabilities were tested after 24 h and 48 h of treatment. Data represent the mean of five determinations; error bars show the SD.

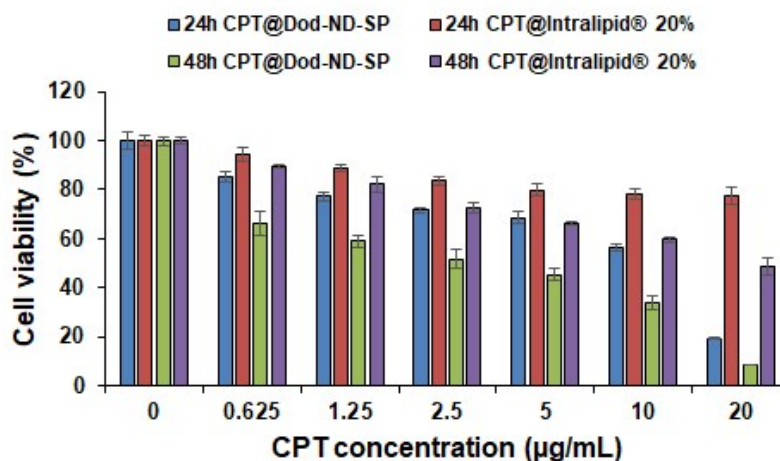

**Figure S2.** *In vitro* anticancer effect of ND-SPs and Intralipid® 20% as a drug delivery carrier. Cytotoxicity evaluation of ND-SPs and Intralipid® 20% at various CPT concentration. U2OS cell viability was tested after 24 h and 48 h of treatment.

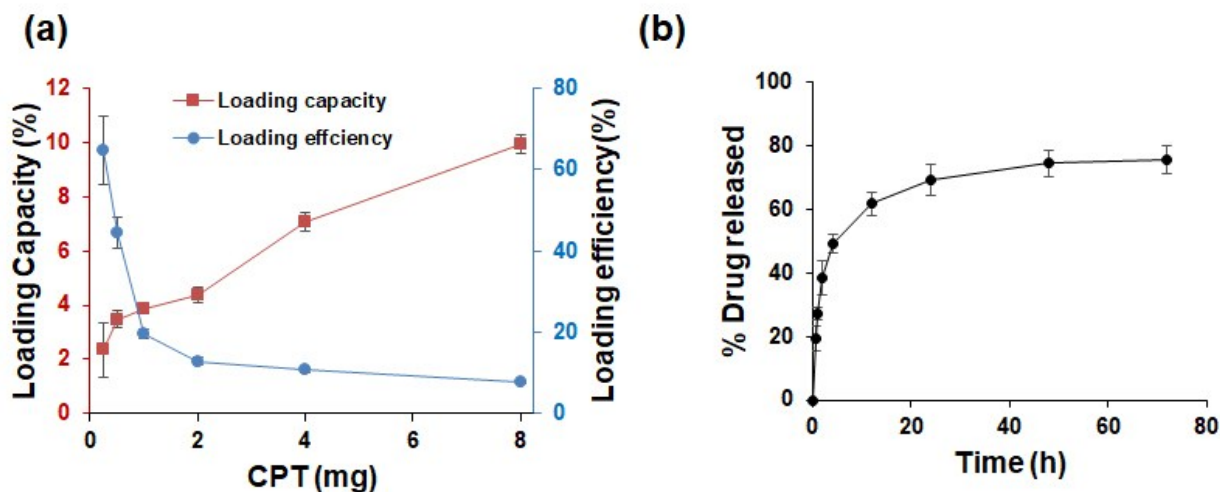

**Figure S3.** (a) Lading capacity and loading efficiency of CPT molecules into ND-SPs. (b) CPT releasing profile from Dod-ND-SPs.
